# Supplementary material
Source: publisher site journal article supplement (https://www.degruyterbrill.com/publication/isbn/9783486593136/downloadAsset/9783486593136_Inhaltsverzeichnis.pdf)
Supplement: Supplementary file 1 [file 9783486593136_Inhaltsverzeichnis.pdf]

## Inhaltsverzeichnis

|                                                                          |            |
|--------------------------------------------------------------------------|------------|
| <b>Vorwort .....</b>                                                     | <b>1</b>   |
| <b>Inhaltsverzeichnis.....</b>                                           | <b>3</b>   |
| <b>Abbildungsverzeichnis.....</b>                                        | <b>5</b>   |
| <b>1. Ausgangssituation und Einführung .....</b>                         | <b>9</b>   |
| 1.1 Internationalisierung und Globalisierung.....                        | 10         |
| 1.2 Mobilität und Kommunikation .....                                    | 16         |
| 1.3 Entwicklung internationaler Wirtschaftsbeziehungen .....             | 18         |
| 1.4 Aktuelle internationale Herausforderungen.....                       | 21         |
| <b>2. Grundlagen internationalen Managements .....</b>                   | <b>24</b>  |
| 2.1 Management .....                                                     | 26         |
| 2.2 Kundenorientiertes/-zentriertes Marketing/Management .....           | 28         |
| 2.3 Management neuer Technologien.....                                   | 32         |
| 2.4 Internationales und Interkulturelles Management .....                | 34         |
| <b>3. Aktionsfelder internationalen Managements.....</b>                 | <b>40</b>  |
| 3.1 Westeuropa – EU – EWR .....                                          | 47         |
| 3.2 Mittel- und Osteuropa (MOE) .....                                    | 51         |
| 3.3 Nordamerika – NAFTA.....                                             | 53         |
| 3.4 Ostasien .....                                                       | 54         |
| 3.5 Südasien – Arabien .....                                             | 56         |
| 3.6 Multinationale Staatenbünde und inter-nationale Organisationen ..... | 59         |
| <b>4. Internationalisierung des Unternehmens .....</b>                   | <b>65</b>  |
| 4.1 Internationalisierungsmotive .....                                   | 66         |
| 4.2 Internationalisierungsanreize und -hemmnisse.....                    | 69         |
| 4.3 Internationalisierungsvoraussetzungen .....                          | 74         |
| 4.4 Internationalisierungsprozess .....                                  | 82         |
| 4.5 Internationalisierungsstrategien .....                               | 90         |
| <b>5. Erfolgsfaktor Geschäftssysteme .....</b>                           | <b>97</b>  |
| 5.1 Funktionale internationale Geschäftssysteme .....                    | 100        |
| 5.2 Institutionelle internationale Geschäftssysteme .....                | 106        |
| <b>6. Erfolgsfaktor Umwelt-/Kulturenmanagement.....</b>                  | <b>113</b> |

|     |                                                           |     |
|-----|-----------------------------------------------------------|-----|
| 6.1 | Umweltdimensionen.....                                    | 114 |
| 6.2 | Umwelteinflüsse.....                                      | 122 |
| 6.3 | Interkulturelles und umweltgerechtes Agieren .....        | 131 |
| 7.  | Erfolgsfaktor Informationsbeschaffung .....               | 135 |
| 7.1 | Ziellandauswahl .....                                     | 139 |
| 7.2 | Markt- und Marketingforschung .....                       | 145 |
| 8.  | Erfolgsfaktor Marketing und Kundenorientierung .....      | 152 |
| 8.1 | Leistungs-/Produktpolitik (product) .....                 | 161 |
| 8.2 | Prozess-/Verrichtungsqualität (process management) .....  | 167 |
| 8.3 | Kontrahierungspolitik (price) .....                       | 169 |
| 8.4 | Distributionspolitik (place).....                         | 173 |
| 8.5 | Erscheinungsbild (physical facilities) .....              | 177 |
| 8.6 | Personalpolitik (personnel) .....                         | 180 |
| 8.7 | Kommunikationspolitik (promotion) .....                   | 184 |
| 8.8 | Öffentliche Meinung (public voice) .....                  | 196 |
| 9.  | Erfolgsfaktor Mensch.....                                 | 201 |
| 9.1 | Anforderungen an internationale Mitarbeiter/Manager ..... | 202 |
| 9.2 | Personalmarketing/-recruitment .....                      | 206 |
| 9.3 | Motivation und Qualifizierung .....                       | 209 |
| 9.4 | Personalmanagement – Diversity Management .....           | 212 |
| 10. | Resümé und Ausblick.....                                  | 215 |
